# Supplementary material
Source: Springer Nature journal article supplement (https://www.springermedizin.de/resource/supplementary/13049_2011_312_MOESM3_ESM.pdf/9666320)

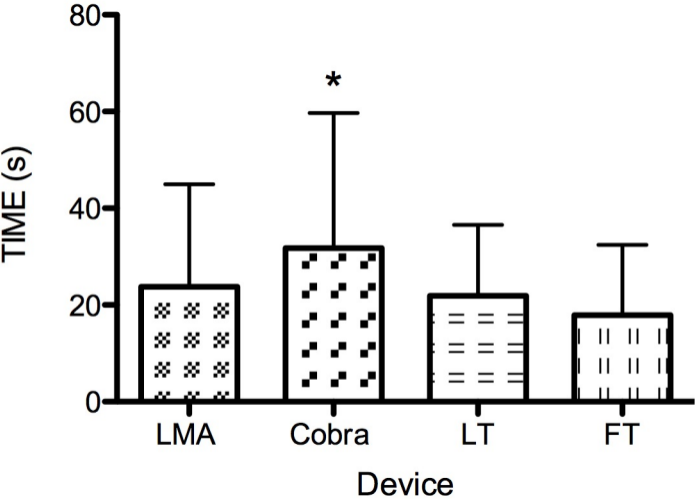

Supplement: MOESM3 [file 9666320]
